# Supplementary material
Source: publisher site journal article supplement (https://www.dovepress.com/article/410036)
Supplement: Supplementary file 1 [file get_supplementary_file.php]

## Supplementary material

**Supplementary Table 1:** Cut-off values defining dose categories.

| Generic drug name                | Inhaler type            | Low daily dose (mcg) | Medium daily dose (mcg) | High daily dose (mcg) |
|----------------------------------|-------------------------|----------------------|-------------------------|-----------------------|
| <b>Beclomethasone</b>            | Aerosol                 | < 600                | ≥ 600 - < 900           | ≥ 900                 |
|                                  | Powder                  | < 600                | ≥ 600 - < 1200          | ≥ 1200                |
|                                  | Aerosol<br>(extra fine) | < 300                | ≥ 300 - < 600           | ≥ 600                 |
| <b>Budesonide</b>                | Aerosol                 | < 600                | ≥ 600 - < 1200          | ≥ 1200                |
|                                  | Powder                  | < 600                | ≥ 600 - < 1200          | ≥ 1200                |
| <b>Fluticasone</b>               | Aerosol                 | < 375                | ≥ 375 - < 750           | ≥ 750                 |
|                                  | Powder                  | < 350                | ≥ 350 - < 750           | ≥ 750                 |
| <b>Ciclesonide</b>               | Aerosol                 | < 120                | ≥ 120 - < 400           | ≥ 400                 |
| <b>Beclomethasone/formoterol</b> | Aerosol/powder          | ≤ 200/12             | ≥ 300/12 - ≤ 500/30     | ≥ 600/18              |
| <b>Budesonide/formoterol</b>     | Aerosol/powder          | ≤ 400/24             | ≥ 480/13.5 - ≤ 900/27   | ≥ 1600/48             |
| <b>Fluticasone/salmeterol</b>    | Aerosol                 | ≤ 300/150            | ≥ 375/50 - ≤ 625/225    | ≥ 750/75              |
|                                  | Powder                  | ≤ 300/150            | ≥ 500/50 - ≤ 600/300    | ≥ 750/100             |
| <b>Fluticasone/vilanterol</b>    | Powder                  | ≤ 92/22              | ≥ 184/22 - ≤ 184/44     | ≥ 368/44              |
| <b>Budesonide/salmeterol</b>     | Powder                  | ≤ 240/40             | ≥ 480/40                | -                     |
| <b>Fluticasone/formoterol</b>    | Aerosol                 | ≤ 250/20             | ≥ 375/15 - ≤ 500/20     | ≥ 750/30              |

**Abbreviations:** mcg, microgram.

**Supplementary Table 2:** Treatment trajectories stratified by first step, with a discontinuation cut-off

value (tPDC) of 0.25.

| <b>First step</b>              | <b>1</b>     | <b>2</b>    | <b>3</b>     | <b>4</b>     | <b>5</b>     | <b>Total</b>  |
|--------------------------------|--------------|-------------|--------------|--------------|--------------|---------------|
| <b>Variables</b>               | n = 10,028   | n = 1,282   | n = 2,946    | n = 2,977    | n = 1,951    | n = 19,184    |
| <b>Follow-up time in</b>       |              |             |              |              |              |               |
| years, median                  | 2.8          | 3.4         | 3.4          | 3.6          | 3.3          | 3.1           |
| (IQR)                          | (1.1 – 6.9)  | (1.2 – 8.2) | (1.3 – 8.1)  | (1.2 – 7.8)  | (1.3 – 7.7)  | (1.2 – 7.4)   |
| <b>Number of switches,</b>     |              |             |              |              |              |               |
| median (IQR)                   | 2 (0 – 4)    | 1 (1 – 4)   | 1 (0 – 3)    | 1 (0 – 3)    | 0 (0 – 1)    | 1 (0 – 3)     |
| <b>Null switches,</b>          |              |             |              |              |              |               |
| n (column %)                   | 3,829 (38.2) | 295 (23.0)  | 779 (26.4)   | 1,082 (36.3) | 1,186 (60.8) | 7,171 (37.4)  |
| <b>First step switched to,</b> |              |             |              |              |              |               |
| n (column %)                   |              |             |              |              |              |               |
| 1                              | -            | 547 (42.7)  | 1,152 (39.1) | 1,147 (38.5) | 251 (12.9)   | 3,097 (16.1)  |
| 2                              | 1,207 (12.0) | -           | 218 (7.4)    | 73 (2.5)     | 54 (2.8)     | 1,552 (8.1)   |
| 3                              | 2,205 (22.0) | 234 (18.3)  | -            | 372 (12.5)   | 132 (6.8)    | 2,943 (15.3)  |
| 4                              | 1,961 (19.6) | 119 (9.3)   | 554 (18.8)   | -            | 328 (16.8)   | 2,962 (15.4)  |
| 5                              | 826 (8.2)    | 87 (6.8)    | 243 (8.2)    | 303 (10.2)   | -            | 1,459 (7.6)   |
| <b>Last step,</b>              |              |             |              |              |              |               |
| n (column %)                   |              |             |              |              |              |               |
| 1                              | 7,602 (75.8) | 595 (46.4)  | 1,212 (41.1) | 1,070 (35.9) | 300 (15.4)   | 10,779 (56.2) |
| 2                              | 299 (3.0)    | 367 (28.6)  | 122 (4.1)    | 49 (1.6)     | 48 (2.5)     | 885 (4.6)     |
| 3                              | 557 (5.6)    | 107 (8.3)   | 1,038 (35.2) | 197 (6.6)    | 96 (4.9)     | 1,995 (10.4)  |
| 4                              | 926 (9.2)    | 129 (10.1)  | 359 (12.2)   | 1,425 (47.9) | 246 (12.6)   | 3,085 (16.1)  |
| 5                              | 644 (6.4)    | 84 (6.6)    | 215 (7.3)    | 236 (7.9)    | 1,261 (64.6) | 2,440 (12.7)  |
| <b>Last step compared to</b>   |              |             |              |              |              |               |
| <b>first, n (column %)</b>     |              |             |              |              |              |               |
| Step-down                      | -            | 595 (46.4)  | 1,334 (45.3) | 1,316 (44.2) | 690 (35.4)   | 3,935 (20.5)  |
| Same step                      | 7,602 (75.8) | 367 (28.6)  | 1,038 (35.2) | 1,425 (47.9) | 1,261 (64.6) | 11,693 (61.0) |
| Step-up                        | 2,426 (24.2) | 320 (25.0)  | 574 (19.5)   | 236 (7.9)    | -            | 3,556 (18.5)  |
| <b>Step difference,</b>        |              |             |              |              |              |               |
| mean (SD)                      | 0.67 (1.29)  | 0.02 (1.24) | -0.60 (1.32) | -1.10 (1.50) | -0.91 (1.47) | -0.00 (1.54)  |
| <b>Step size,</b>              |              |             |              |              |              |               |
| mean (SD)                      | 0.67 (1.29)  | 0.95 (0.80) | 1.13 (0.91)  | 1.26 (1.37)  | 0.91 (1.47)  | 0.88 (1.26)   |

**Abbreviations:** n, number; IQR, inter quartile range; SD, standard deviation.

**Supplementary Table 3:** Descriptives of treatment trajectories if periods without treatment dispenses are considered to be step 0.

| Variables                                        | At start      | End of follow-up | Overall       |
|--------------------------------------------------|---------------|------------------|---------------|
| <b>Step,</b><br>n (column %)                     |               |                  |               |
| 0                                                | -             | 10,968 (57.2)    |               |
| 1                                                | 10,028 (52.3) | 4,282 (22.3)     |               |
| 2                                                | 1,282 (6.7)   | 377 (2.0)        |               |
| 3                                                | 2,946 (15.4)  | 773 (4.0)        |               |
| 4                                                | 2,977 (15.5)  | 1,605 (8.4)      |               |
| 5                                                | 1,951 (10.2)  | 1,179 (6.1)      |               |
| <b>Number of switches,</b><br>median (IQR)       |               |                  | 3 (1 – 6)     |
| <b>Last step compared to first,</b> n (column %) |               |                  |               |
| Step-down                                        |               |                  | 12,779 (66.6) |
| Same step                                        |               |                  | 4,293 (22.4)  |
| Step-up                                          |               |                  | 2,112 (11.0)  |
| <b>Null switches,</b><br>n (column %)            |               |                  | (8.9)         |
| <b>Step difference,</b><br>median (IQR)          |               |                  | -1 (-3 – -1)  |

**Abbreviations:** n, number; IQR, inter quartile range; SD, standard deviation.

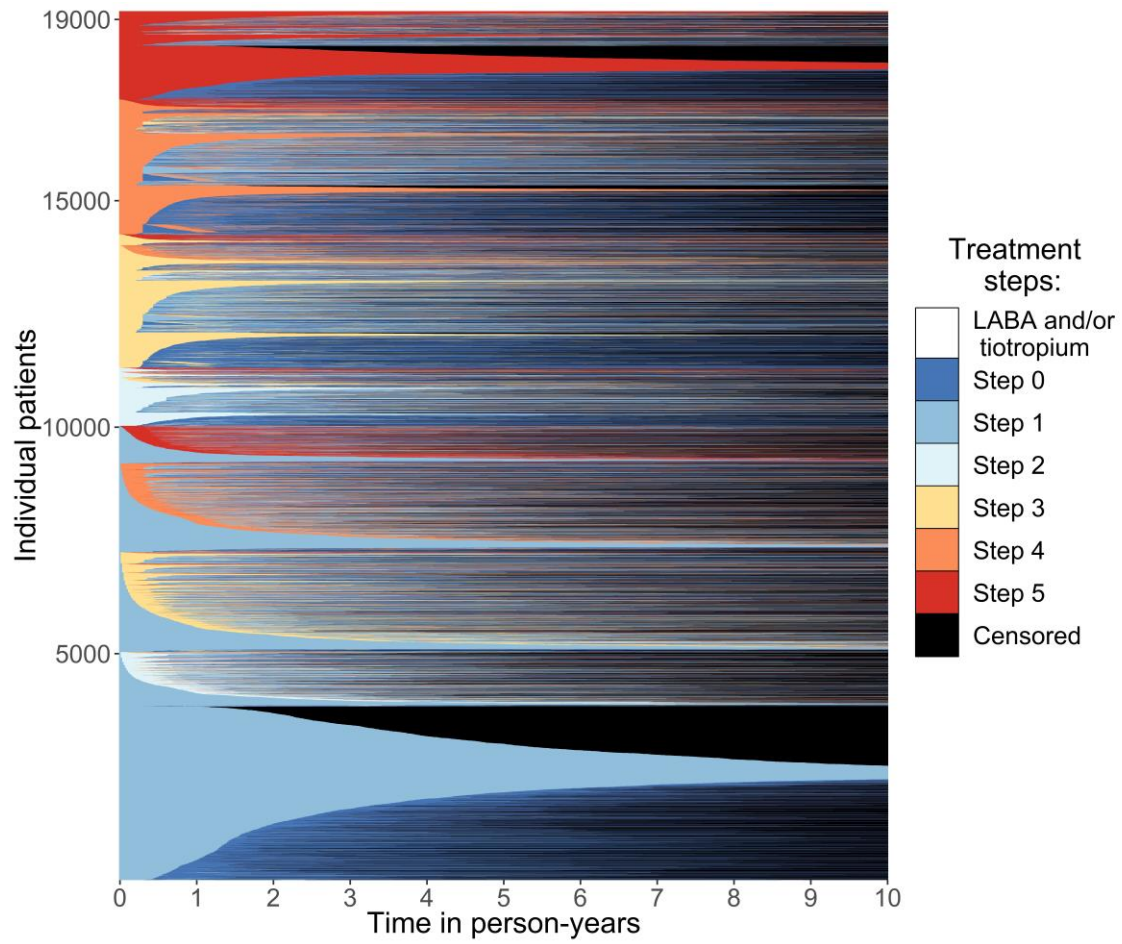

**Supplementary Figure 1:** Treatment steps of individuals over a period of 10 person-years with a tPDC of 0.25.

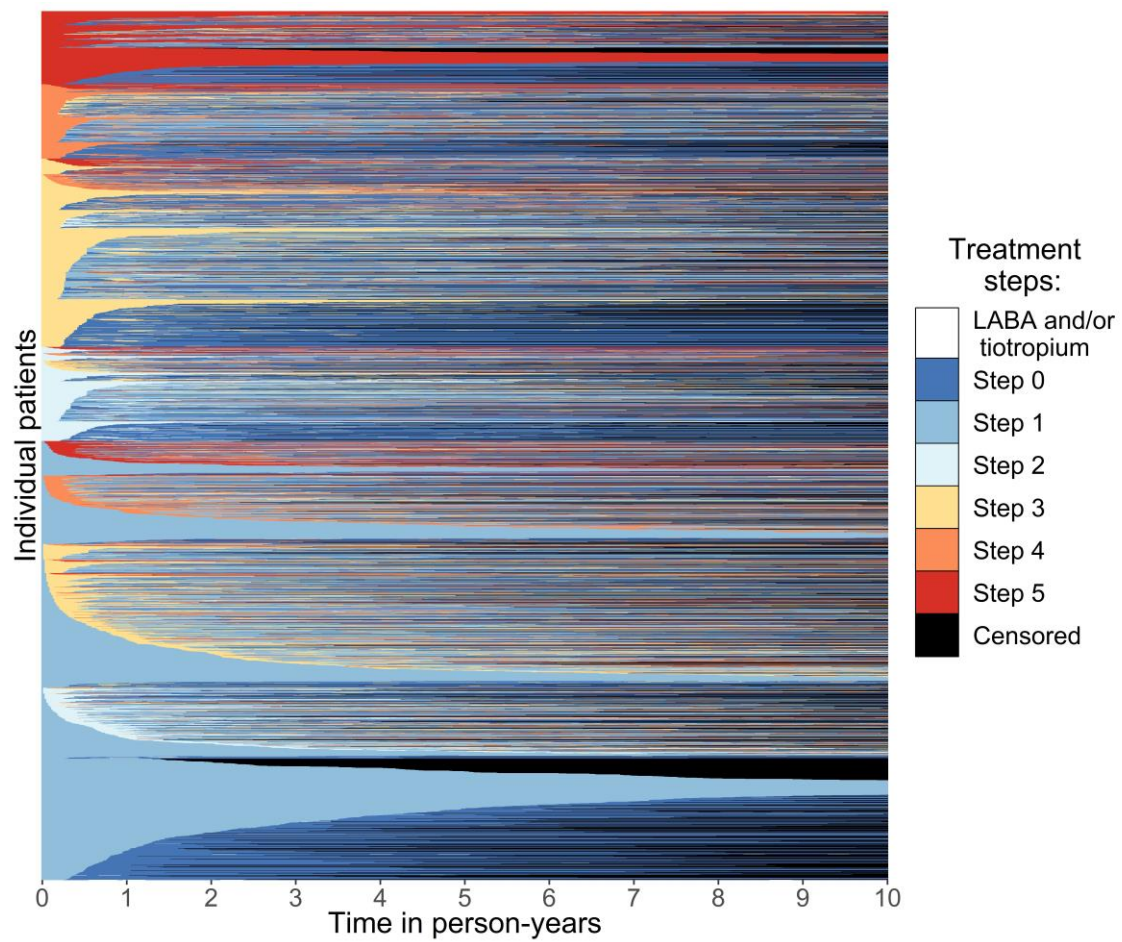

**Supplementary Figure 2:** Treatment steps of individuals who initiated treatment between 1995-01-01 and 2001-12-31.

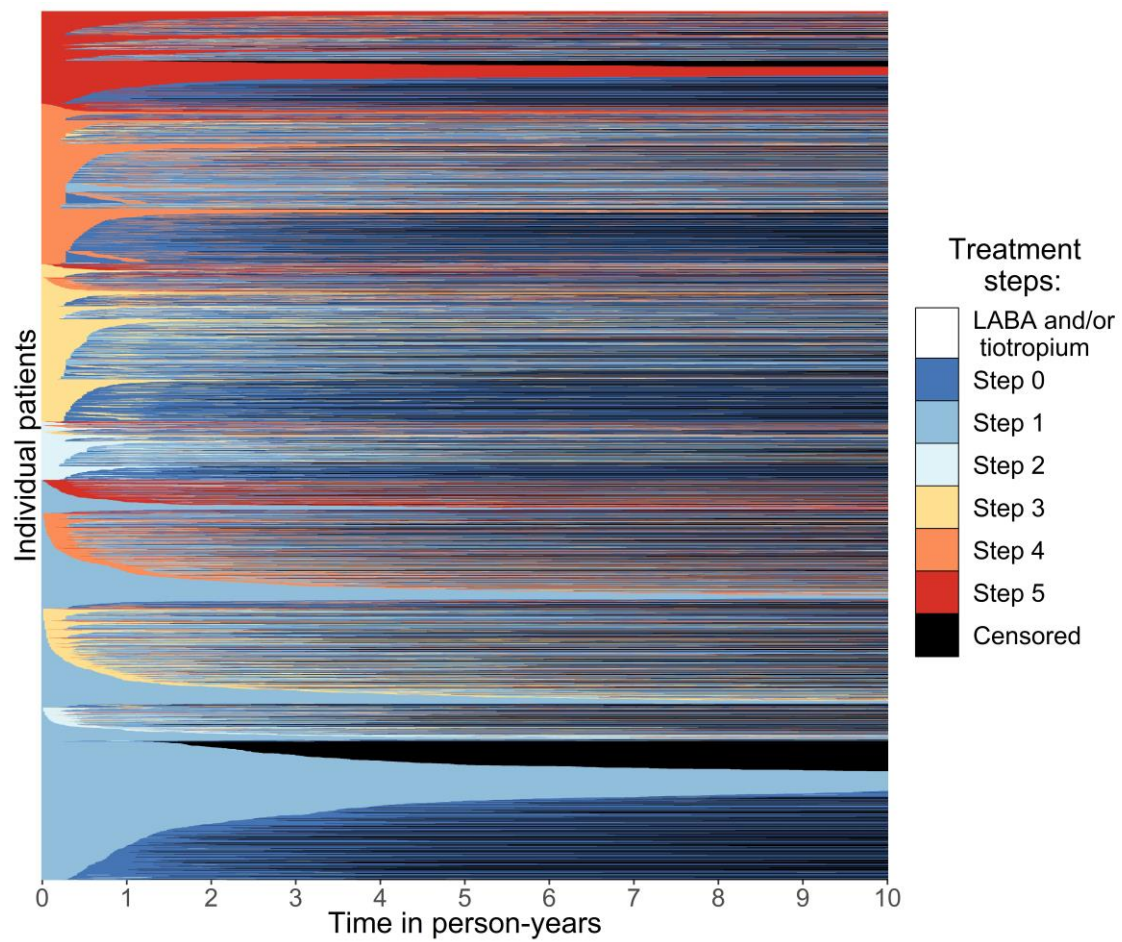

**Supplementary Figure 3:** Treatment steps of individuals who initiated treatment between 2002-01-01 and 2007-12-31.

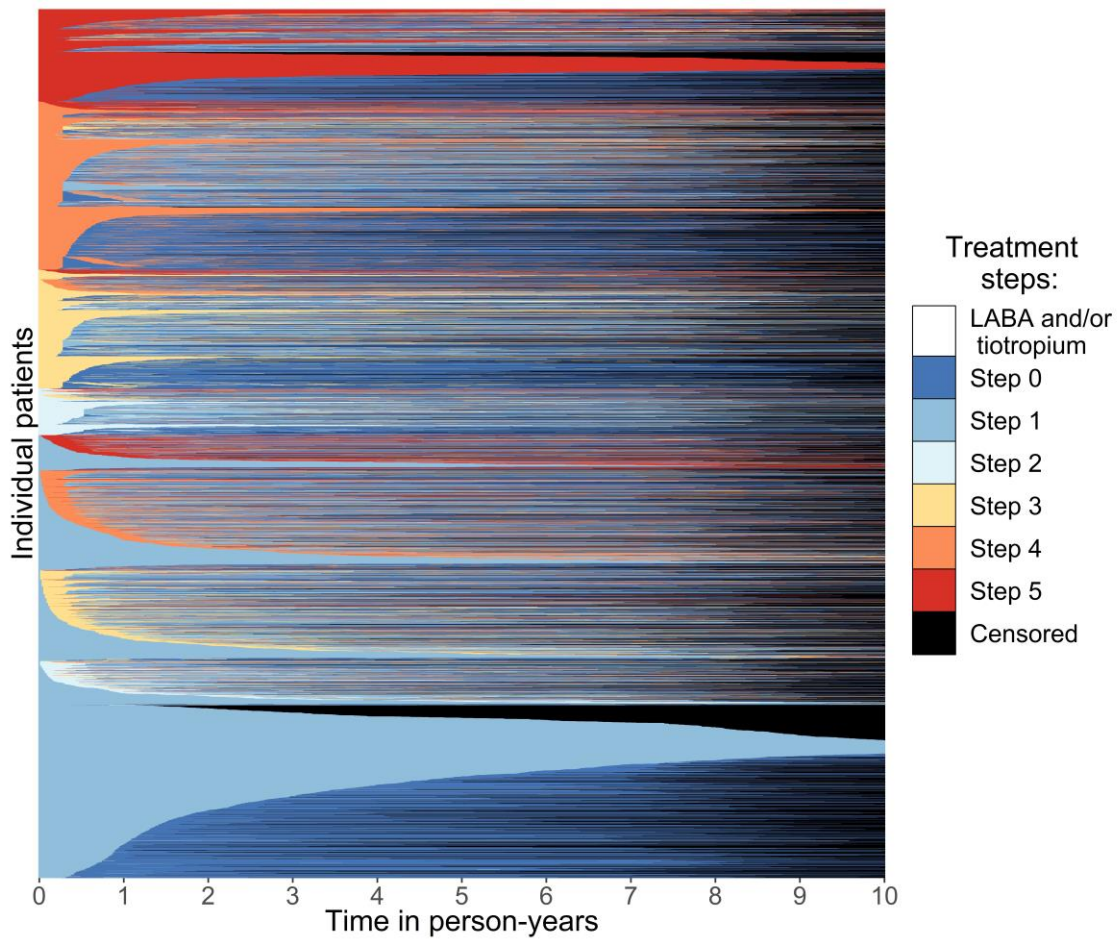

**Supplementary Figure 4:** Treatment steps of individuals who initiated treatment between 2008-01-01 and 2013-12-31.

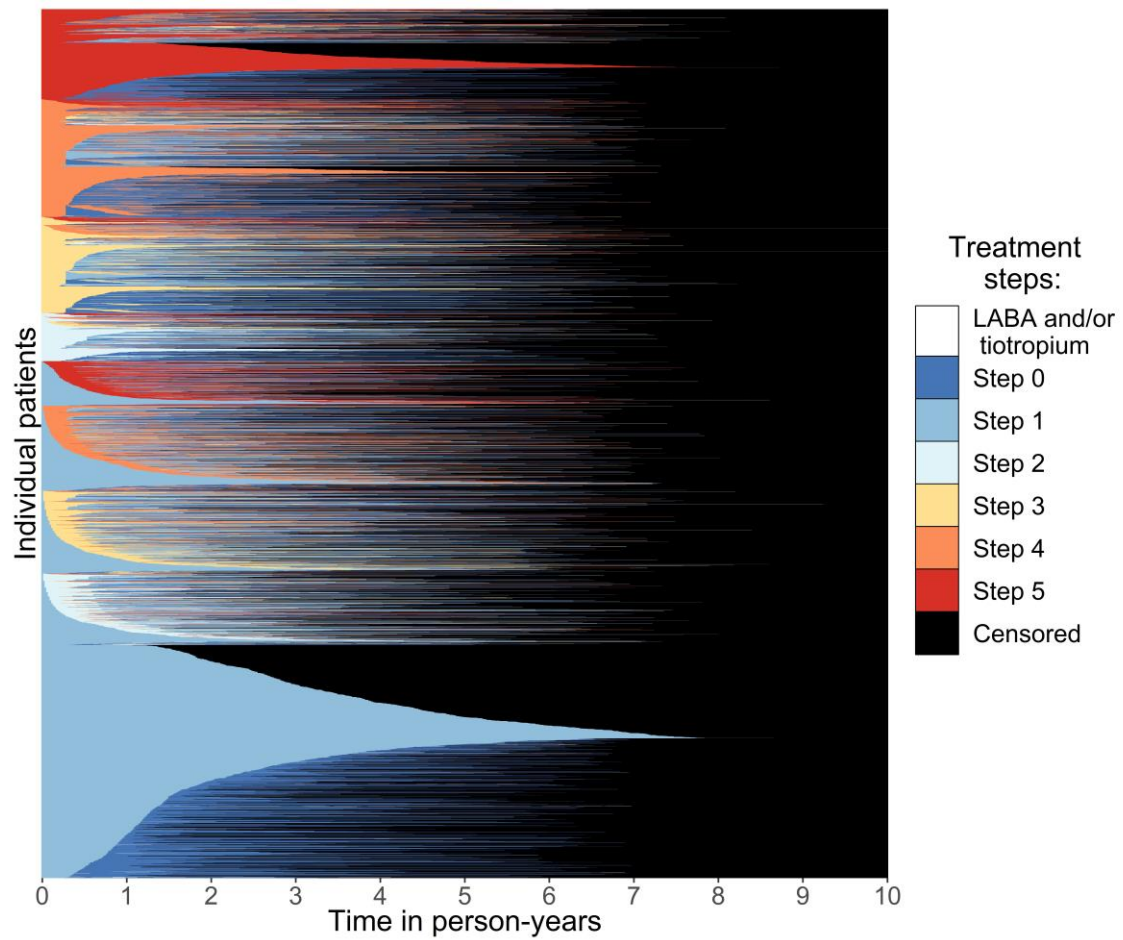

**Supplementary Figure 5:** Treatment steps of individuals who initiated treatment between 2014-01-01 and 2020-12-31.
